# Supplementary material for: Adaptive Interactions of Achromobacter spp. with Pseudomonas aeruginosa in Cystic Fibrosis Chronic Lung Co-Infection
Source: MDPI journal article supplement (doi:10.3390/pathogens10080978), 2021-08-03
Supplement: s1 [file s1]

Supplementary materials:

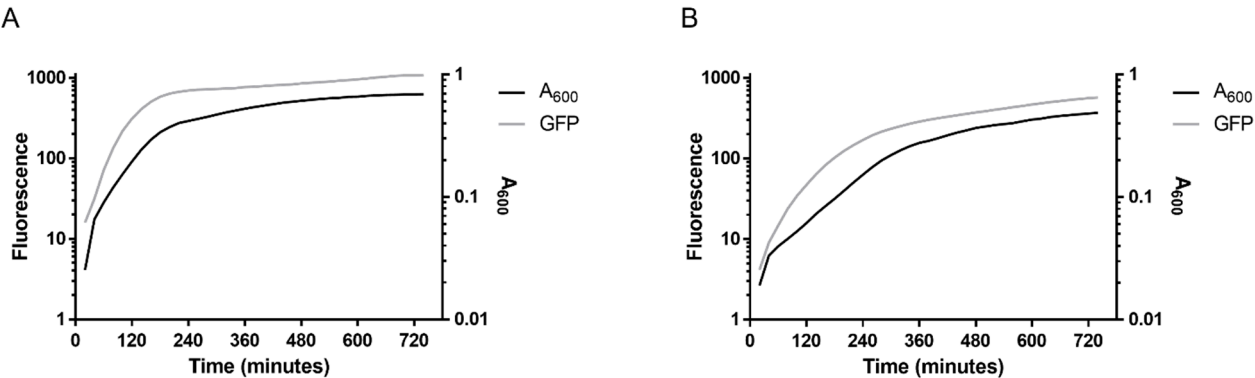

**Figure S1.** Growth and fluorescence emission curves of GFP-tagged P1 (A) and P2 (B) isolates. GFP fluorescence (excitation 475 nm, emission 520 nm) and  $A_{600}$  were measured every 20 min for 12 h.

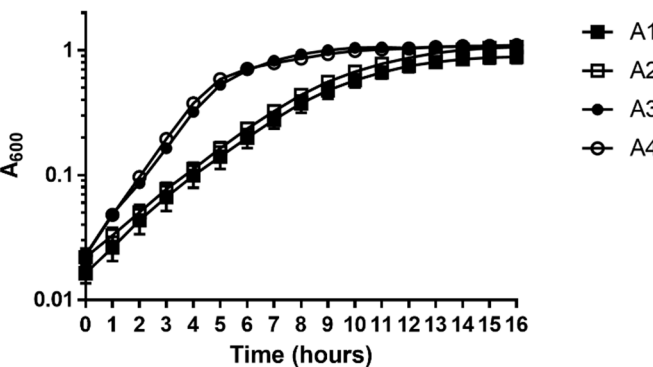

**Figure S2.** Growth curves of *Achromobacter* spp. isolates.  $A_{600}$  was measured every hour for 16 h.

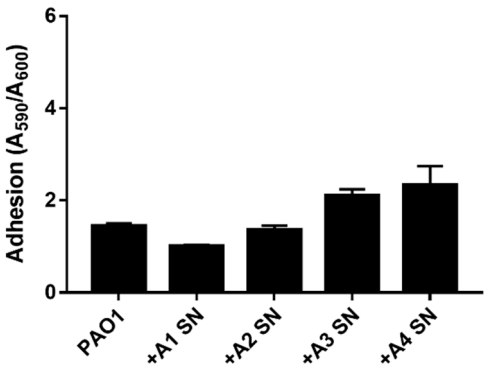

**Figure S3.** Adhesion of *P. aeruginosa* PAO1 strain in absence and presence of the culture supernatants (SN) collected from the clinical *Achromobacter* spp. isolates (A1, A2, A3 and A4). Adhesion was measured by crystal violet staining of surface-attached bacteria ( $A_{590}$ ) divided by absorbance of planktonic bacteria ( $A_{600}$ ).
